# Supplementary material for: A strategy for constructing anti-adhesion surfaces based on interfacial thiol–ene photoclick chemistry between DOPA derivatives with a catechol anchor group and zwitterionic betaine macromolecules
Source: Royal Society of Chemistry journal article supplement (doi:10.1039/c6py01043a), 2016-01-01
Supplement: c6py01043a1.pdf [file c6py01043a1.pdf]

## Supporting Information

### **A strategy for constructing anti-adhesion surfaces based on interfacial thiol-ene photoclick chemistry between DOPA derivatives with a catechol anchor group and zwitterionic betaine macromolecules**

Liyang Wang, Guangji Li\*, Yinlei Lin, Zixun Zhang, Zhifeng Chen and Shuqing Wu\*

*School of Materials Science and Engineering, South China University of Technology, Guangzhou 510640, China*

*Corresponding author: Guangji Li, Shuqing Wu*

*Fax: +86 20 87113949*

*E-mail address: [gji@scut.edu.cn](mailto:gji@scut.edu.cn) (G. Li), [wushuqing@scut.edu.cn](mailto:wushuqing@scut.edu.cn) (S. Wu).*

#### **Synthesis of N,N'-Bis(acryloyl)cystamine (BAC)**

N,N'-Bis(acryloyl)cystamine (BAC) was synthesized similar to the method established by E. Elisa *et al.* Cystamine dihydrochloride (CADH) (11.60 g, 0.05 mol) was added to a four-necked, 500 mL flask containing deionized water (50 mL) which was cooled to 0 – 5 °C. Then acryloyl chloride (AC) dissolved in dichloromethane solution (10 mL, 10 mol/L) and an aqueous NaOH solution (20 mL, 10 mol/L) were added simultaneously and dropwise under stirring over a total time span of 1 h. Meanwhile, the temperature of the reaction system was kept at 0 – 5 °C. After the addition was completed, the reaction mixture was stirred for more than 2 h at room temperature and filtrated. The filtrate was extracted three times with 100 mL of dichloromethane and the organic phases were dried over MgSO<sub>4</sub> and filtrated. Finally, the solvent was removed in a rotary evaporator at 40 °C, so obtaining the white powdery solid product. Yield: 60 %.

FTIR (KBr pellet, cm<sup>-1</sup>): 3252 (N–H, stretch); 3067 (=C–H, stretch); 2925, 2855 (–CH<sub>3</sub>, –CH<sub>2</sub>–, stretch); 1667 (C

=O, stretch); 1653 (C=C, stretch); 1556 (N-H, in-plane bend); 1466 (-CH<sub>2</sub>-, deformation); 1405 (-CH<sub>3</sub>, deformation), 1311 (C-H, in-plane bend); 1254 (-CH<sub>3</sub>, deformation); 696 (N-H, out-of-plane bend). (ESI, Fig. S1 †)

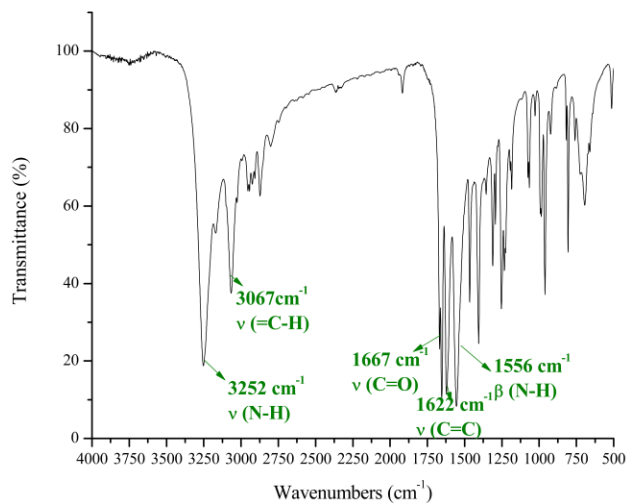

**Fig. S1** FTIR spectrum of BAC.

### Synthesis of N,N-dimethyl-N-(3-methacrylamidopropyl)-N-(3-sulfopropyl) ammonium betaine (DMAPMAPS)

N,N-dimethyl-N-(3-methacrylamidopropyl)-N-(3-sulfopropyl) ammonium betaine (DMAPMAPS) was synthesized by the ring-opening reaction between DMAPMA and 1,3-PS. A mixture of 1,3-PS (13.18 g, 0.11 mol) and acetone (25 mL) was added dropwise into a three-necked flask containing a mixture of DMAPMA (17.02 g, 0.10 mol) and acetone (25 mL) under stirring over a total time span of 0.5 h. Then the reaction mixture was stirred for more than 24 h at room temperature and filtrated. The residue was washed and vacuum dried at 40 °C, and then the final white powdery product was obtained. Yield: 94%.

FTIR (KBr pellet, cm<sup>-1</sup>): 3320 (N-H, stretch); 3030 (=C-H, stretch); 2976, 2928, 2877 (-CH<sub>3</sub>, -CH<sub>2</sub>-, stretch); 1653 (C=O, stretch); 1611 (C=C, stretch); 1543 (N-H, in-plane bend); 1484 (N<sup>+</sup>-C, stretch); 1193 (S=O, deformation); 1034 (S=O, deformation). (ESI, Fig. S2 †)

<sup>1</sup>H-NMR δ (400 MHz, D<sub>2</sub>O, ppm): 5.66 ppm (s, 1H, CHH=CH-); 5.42 ppm (s, 1H, CHH=CH-); 3.40 ~ 3.44 ppm (t, 2H, SO<sub>3</sub>-CH<sub>2</sub>-CH<sub>2</sub>-CH<sub>2</sub>-); 3.29 ~ 3.33 ppm (m, 4H, -NH-CH<sub>2</sub>-); 3.05 ppm (s, 6H, -N(CH<sub>3</sub>)<sub>2</sub>-); 2.90 ~ 2.94 ppm (t, 2H, -CH<sub>2</sub>-SO<sub>3</sub>); 2.11 ~ 2.19 ppm (m, 2H, -CH<sub>2</sub>-CH<sub>2</sub>-SO<sub>3</sub>); 1.96 ppm (s, 2H, -CO-C(CH<sub>3</sub>)=). (ESI, Fig. S3 †)

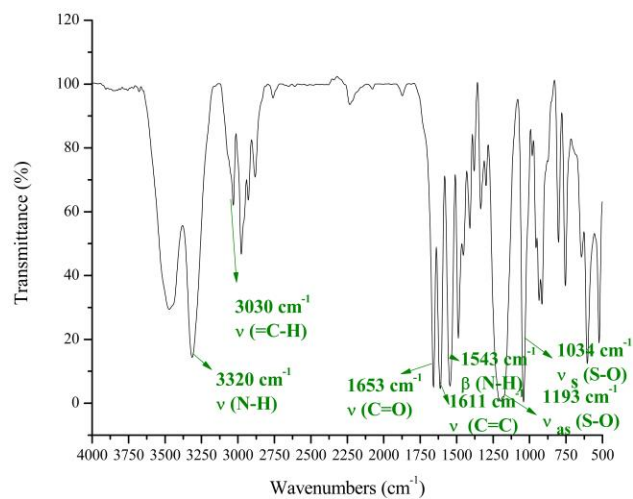

**Fig. S2** FTIR spectrum of DMPMAPS.

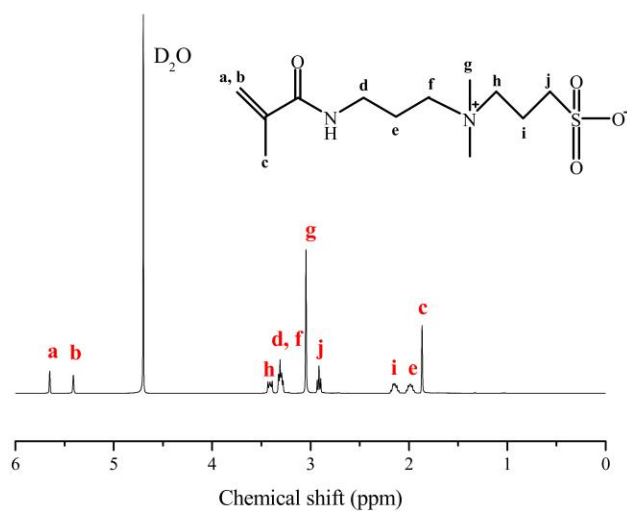

**Fig. S3** <sup>1</sup>H-NMR spectrum of DMAPMAPS.

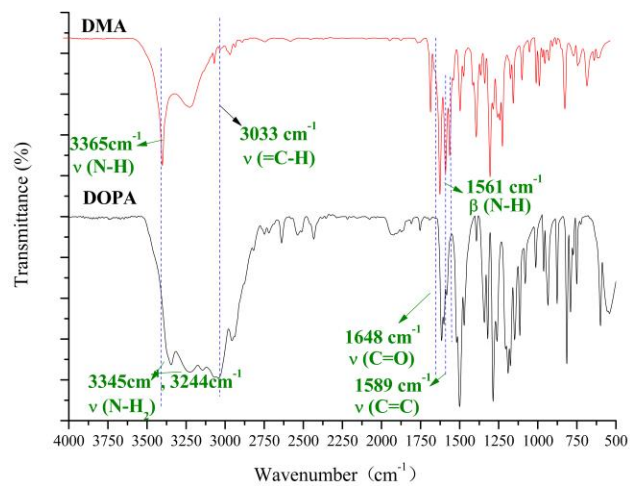

**Fig. S4** FTIR spectra of DMA and DOPA.

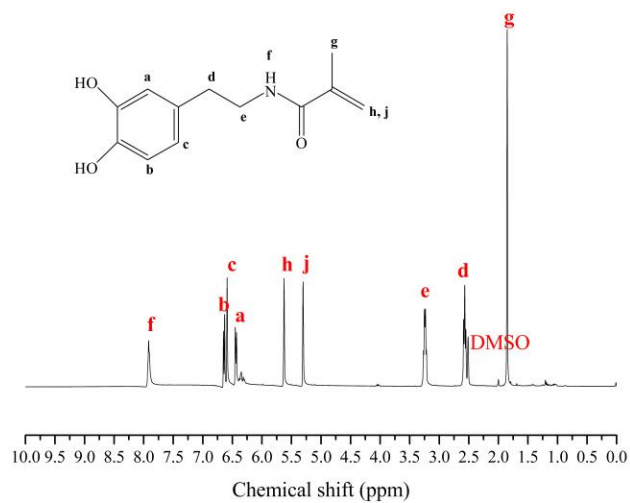

**Fig. S5**  $^1\text{H-NMR}$  spectrum of DMA.

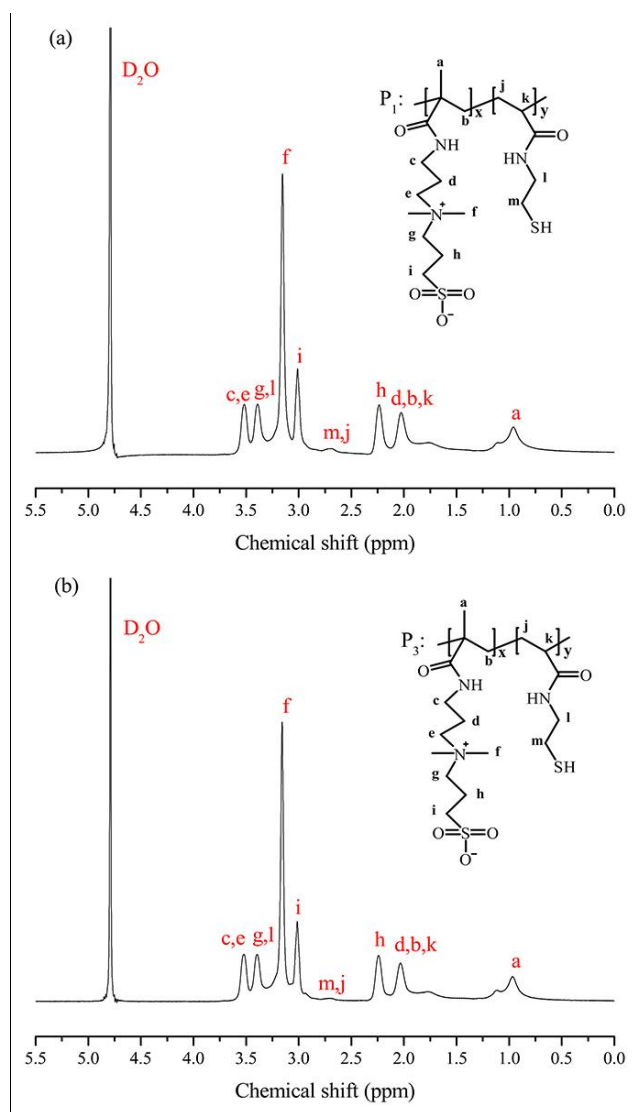

**Fig. S6**  $^1\text{H-NMR}$  spectra of poly (DMAPMPS-*co*-BAC) sample P<sub>1</sub> (a) and P<sub>3</sub> (b).

**Table S1** The data on integral areas of  $^1\text{H}$  NMR spectra of  $\text{P}_1$  and  $\text{P}_3$ .

| Proton peak | Chemical shift<br>(ppm) | Integral area |              |
|-------------|-------------------------|---------------|--------------|
|             |                         | $\text{P}_1$  | $\text{P}_3$ |
| a           | 0.96                    | 1.70          | 1.63         |
| c, e        | 3.51                    | 1.00          | 1.00         |
| d, b, k     | 2.01                    | 2.32          | 2.17         |
| f           | 3.15                    | 1.08          | 3.96         |
| g, l        | 3.39                    | 3.57          | 1.16         |
| h           | 2.23                    | 1.13          | 1.14         |
| i           | 3.01                    | 1.26          | 1.38         |
| m, j        | 2.72                    | 0.14          | 0.07         |
